# Supplementary material for: Predicting Hemodynamic Failure Development in PICU Using Machine Learning Techniques
Source: MDPI journal article supplement (doi:10.3390/diagnostics11071299), 2021-07-20
Supplement: s1 [file s1]

Table S2. Comparison of the performance of the MLT algorithms (complete cases - without imputation). Measures are reported as I quartile/Median/III quartile.

| Technique | Sampling Method   | Sensitivity           | Specificity           | Accuracy              | ROC                   |
|-----------|-------------------|-----------------------|-----------------------|-----------------------|-----------------------|
| GLM       | Original sampling | 1 / 1 / 1             | 0 / 0 / 0             | 0.985 / 0.985 / 0.986 | 0.738 / 0.750 / 0.758 |
|           | Downsampling      | 0.624 / 0.648 / 0.666 | 0.671 / 0.706 / 0.735 | 0.626 / 0.649 / 0.666 | 0.730 / 0.752 / 0.760 |
|           | Upsampling        | 0.636 / 0.644 / 0.667 | 0.677 / 0.690 / 0.715 | 0.637 / 0.644 / 0.667 | 0.738 / 0.746 / 0.760 |
| RPART     | Original sampling | 0.995 / 0.996 / 0.997 | 0.007 / 0.014 / 0.021 | 0.980 / 0.981 / 0.983 | 0.667 / 0.683 / 0.708 |
|           | Downsampling      | 0.670 / 0.716 / 0.729 | 0.559 / 0.604 / 0.646 | 0.670 / 0.715 / 0.727 | 0.697 / 0.713 / 0.731 |
|           | Upsampling        | 0.974 / 0.975 / 0.977 | 0.058 / 0.077 / 0.091 | 0.962 / 0.963 / 0.965 | 0.516 / 0.525 / 0.531 |
| NNET      | Original sampling | 1 / 1 / 1             | 0 / 0 / 0             | 0.985 / 0.986 / 0.986 | 0.754 / 0.762 / 0.769 |
|           | Downsampling      | 0.587 / 0.625 / 0.683 | 0.68 / 0.725 / 0.773  | 0.590 / 0.626 / 0.684 | 0.691 / 0.711 / 0.734 |
|           | Upsampling        | 0.609 / 0.672 / 0.700 | 0.647 / 0.706 / 0.791 | 0.612 / 0.672 / 0.699 | 0.701 / 0.733 / 0.744 |
| RF        | Original sampling | 0.999 / 0.999 / 0.999 | 0 / 0 / 0.007         | 0.985 / 0.986 / 0.986 | 0.710 / 0.715 / 0.732 |
|           | Downsampling      | 0.742 / 0.752 / 0.772 | 0.604 / 0.634 / 0.671 | 0.741 / 0.751 / 0.769 | 0.768 / 0.781 / 0.786 |
|           | Upsampling        | 0.998 / 0.998 / 0.999 | 0.007 / 0.013 / 0.015 | 0.984 / 0.985 / 0.985 | 0.713 / 0.723 / 0.731 |
| XGB       | Original sampling | 0.998 / 0.998 / 0.998 | 0.007 / 0.019 / 0.027 | 0.984 / 0.985 / 0.985 | 0.725 / 0.737 / 0.745 |
|           | Downsampling      | 0.730 / 0.738 / 0.754 | 0.616 / 0.658 / 0.678 | 0.728 / 0.737 / 0.752 | 0.766 / 0.772 / 0.786 |
|           | Upsampling        | 0.990 / 0.991 / 0.991 | 0.044 / 0.060 / 0.071 | 0.977 / 0.978 / 0.979 | 0.732 / 0.743 / 0.750 |

Abbreviations: GLM, Generalized Linear Models; RPART, Recursive Partition Tree; NNET, Neural Networks; RF, Random Forest; XGB, Extreme Gradient Boosting; ROC, Receiving Operative Characteristic.
