# Supplementary material for: Predicting Hemodynamic Failure Development in PICU Using Machine Learning Techniques
Source: MDPI journal article supplement (doi:10.3390/diagnostics11071299), 2021-07-20
Supplement: s1 [file s1]

Table S1. Definition of outcome and clinical conditions adopted in the TIPNet database.

| Condition                            | Definition                                                                                                                                                                       |
|--------------------------------------|----------------------------------------------------------------------------------------------------------------------------------------------------------------------------------|
| <b>Hemodynamic failure (outcome)</b> | Need to use catecholamines                                                                                                                                                       |
| <b>Respiratory failure</b>           | Need for oxygen therapy or need for ventilation                                                                                                                                  |
| <b>Renal failure</b>                 | Oliguria or impaired kidney function (based on normal thresholds depending on age)                                                                                               |
| <b>Neurological failure</b>          | P/U level at AVPU scale; Glasgow Coma Scale score < 9                                                                                                                            |
| <b>Coagulopathy*</b>                 | Impaired coagulation or platelet reduction, platelet count $\leq 80,000/\text{mm}^3$ or a 50% reduction in value from the highest of the previous three days or $\text{INR} > 2$ |
| <b>Liver failure*</b>                | Total plasma bilirubin $> 4 \text{ mg/dl}$ in the absence of haemolysis, neonatal hyper-bilirubin or primary liver disease or ALT greater than twice the age limit               |
| <b>Organ failure</b>                 | The presence of at least one condition among those reported above                                                                                                                |

Abbreviations: AVPU, alert, verbal, pain, unresponsive.

\* These deficiencies, being very low in our sample, were not considered individually but fall into the 'Organ failure' macro-category.
