# Supplementary figures and images for: Predicting Hemodynamic Failure Development in PICU Using Machine Learning Techniques
Source: MDPI journal article supplement (doi:10.3390/diagnostics11071299), 2021-07-20

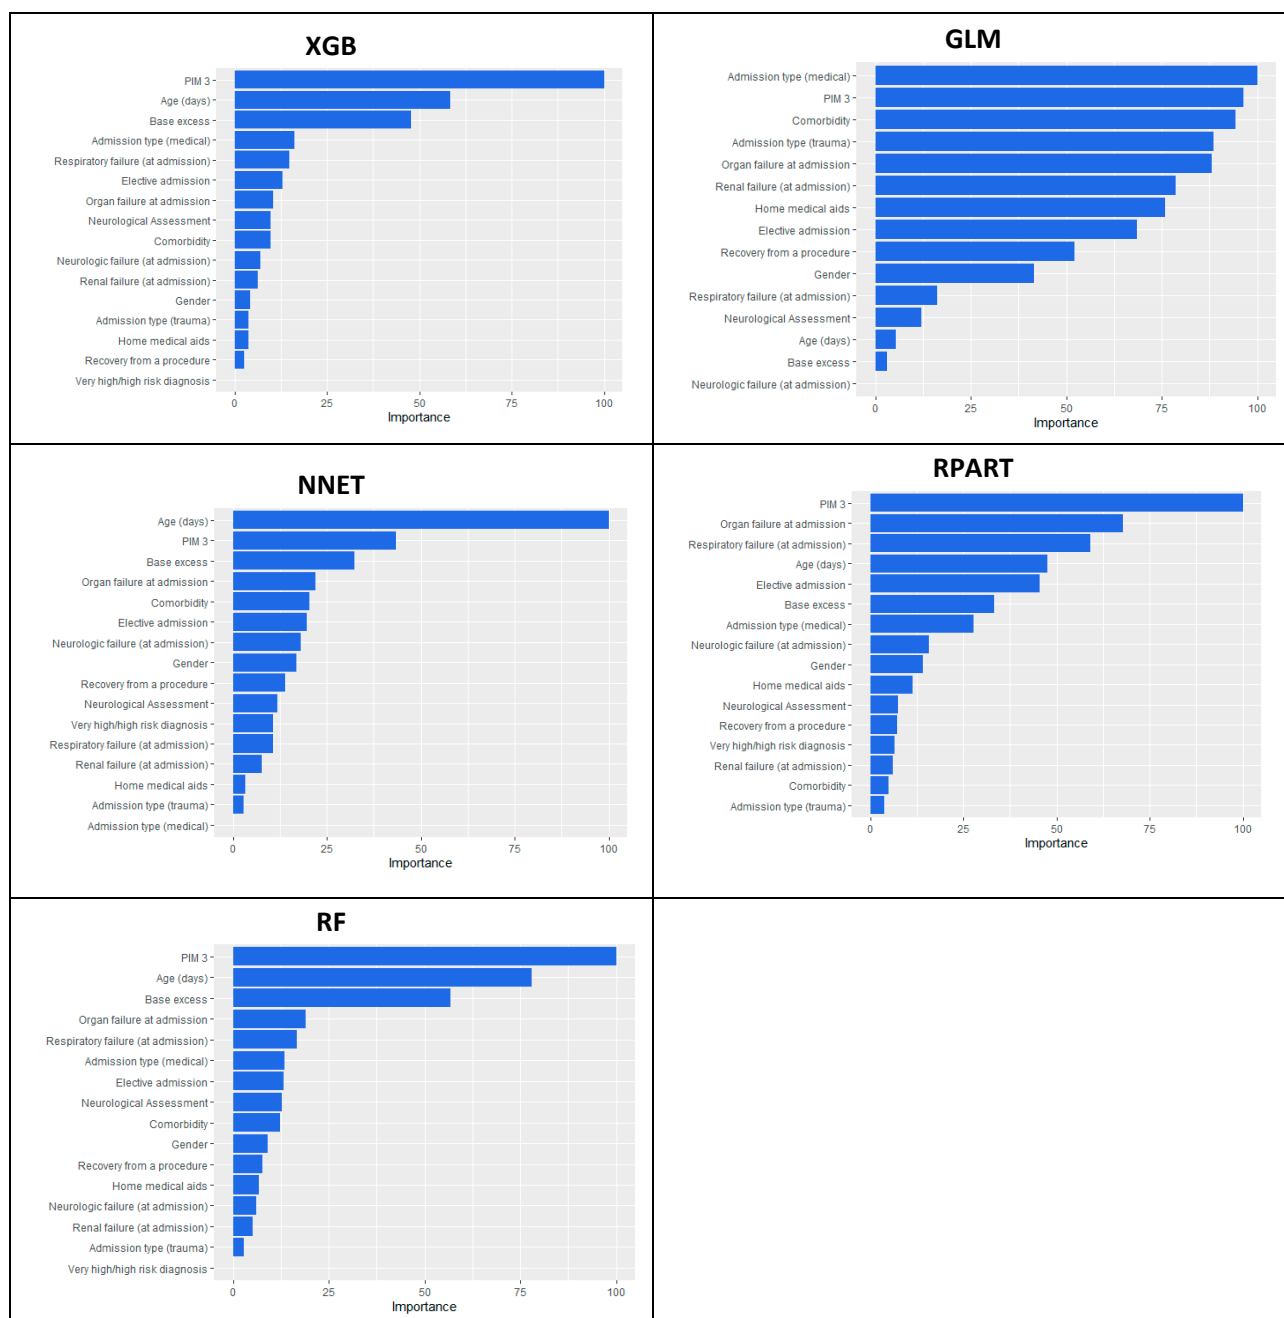

**Figure S1.** Random Forest's variable importance plot for the XGB, GLM, NNET, RPART, RF methods.

Supplement: s1 [file s1]
